# Supplementary material
Source: PubMed Central journal article supplement (PMC7483366)
Supplement: NIHMS1580242-supplement-1.pdf [file NIHMS1580242-supplement-1.pdf]

## Eligibility and Recruitment for the Protocol T Follow-up Study

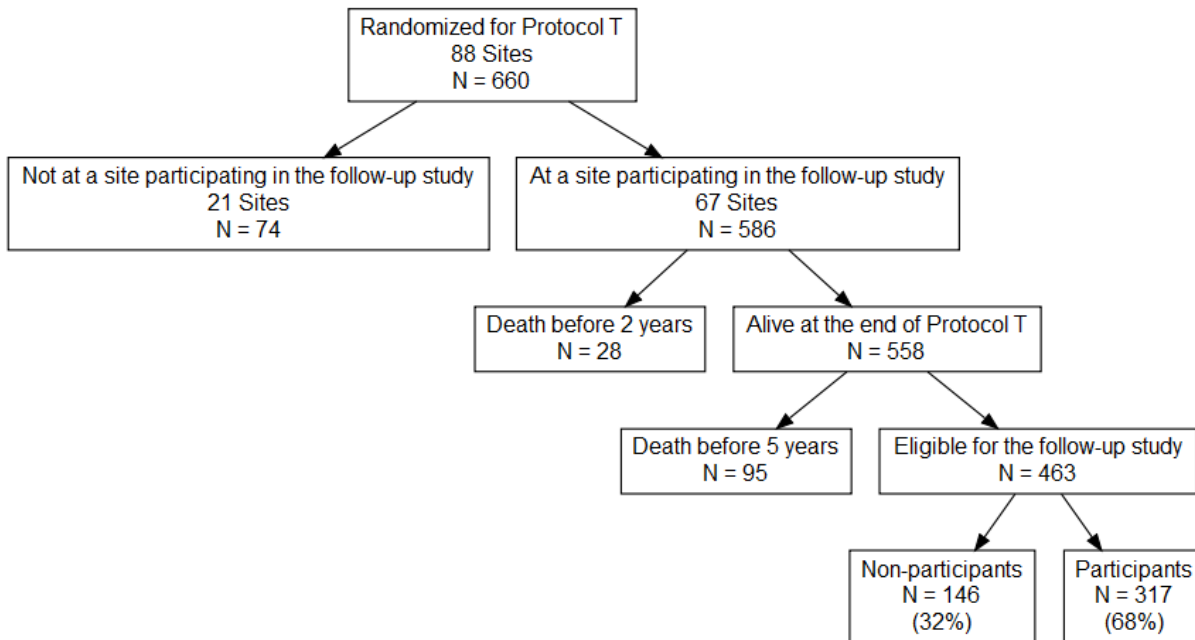

Supplemental Figure 1.

Flowchart showing the eligibility and recruitment of participants for a 5-year follow-up study after initial randomization into a 2-year clinical trial on anti-vascular endothelial growth factor treatment for eyes with diabetic macular edema (Protocol T).
