# Supplementary material
Source: PubMed Central journal article supplement (PMC7483366)
Supplement: NIHMS1580242-supplement-2.pdf [file NIHMS1580242-supplement-2.pdf]

## Mean Change in Visual Acuity over Time

### All Follow-up Study Participants

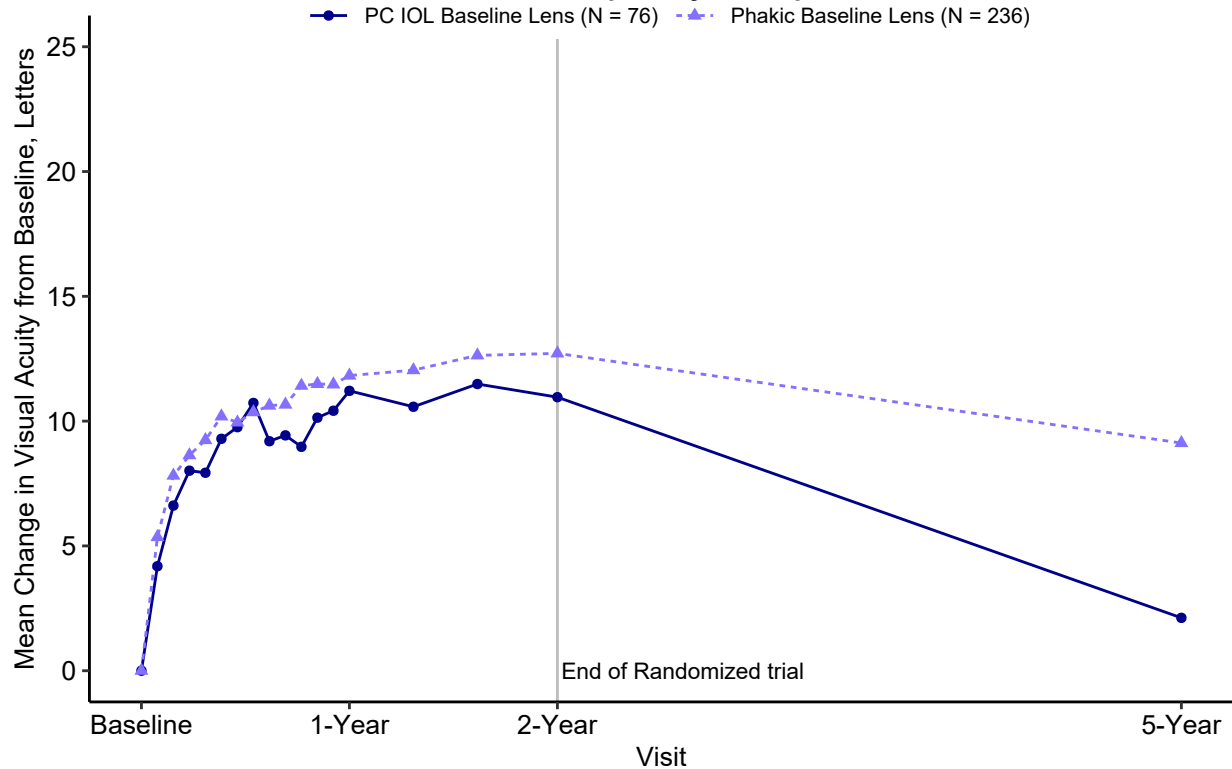

Supplemental Figure 2.

Mean change in visual acuity over time among follow-up participants from a 2-year clinical trial on anti-vascular endothelial growth factor treatment for eyes with diabetic macular edema (Protocol T). Change in visual acuity was truncated to the mean  $\pm$  3 standard deviations of the change from baseline to 5 years ( $7.12 \pm 3 \times 16.04$ ). Eyes missing visual acuity at the 5-year visit were excluded.
