# Supplementary material
Source: PubMed Central journal article supplement (PMC7483366)
Supplement: NIHMS1580242-supplement-4.pdf [file NIHMS1580242-supplement-4.pdf]

## Mean Change in Central Subfield Thickness over Time

### Follow-up Study Participants with Baseline Visual Acuity of 20/32 to 20/40

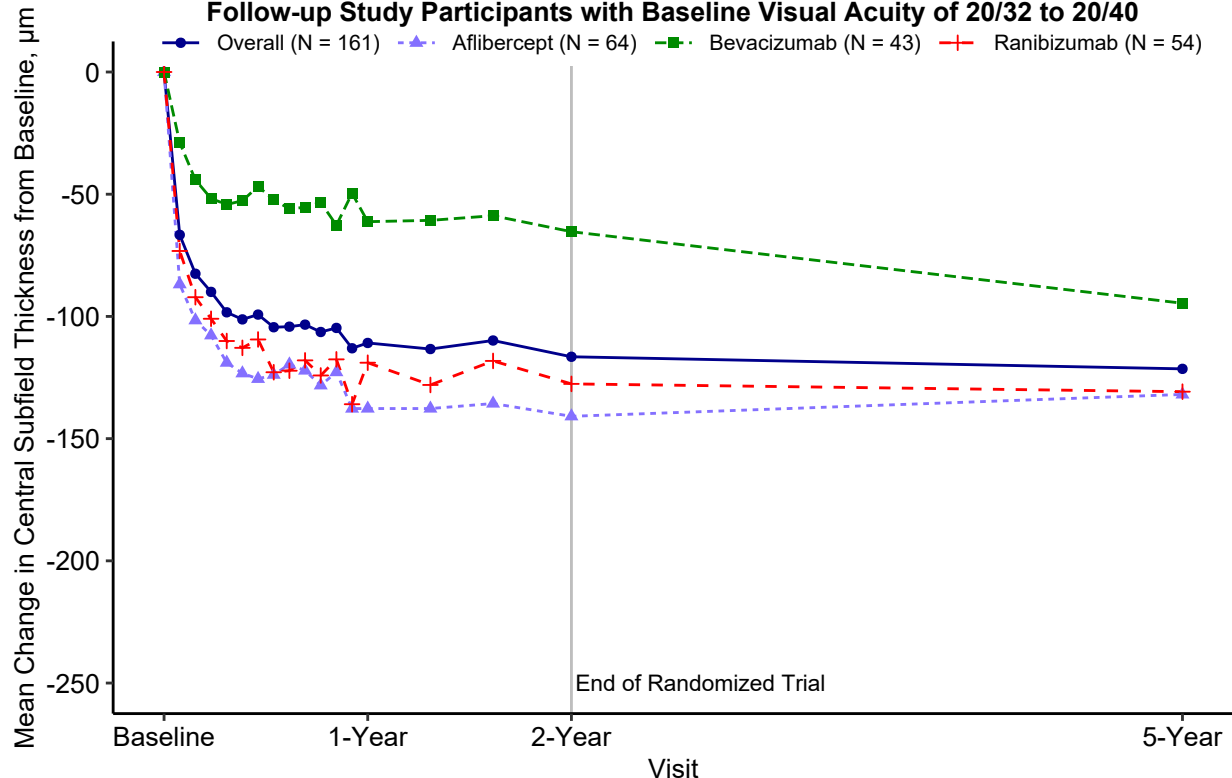

Supplemental Figure 4.

Mean change in optical coherence tomography central subfield thickness over time among follow-up study participants with baseline visual acuity of 78 to 69 letters (approximate Snellen equivalent 20/32 to 20/40) from a 2-year clinical trial on anti-vascular endothelial growth factor treatment for eyes with diabetic macular edema (Protocol T). Change in central subfield thickness was truncated to the mean  $\pm$  3 standard deviations of central subfield thickness change from baseline to 5 years ( $-154.5 \pm 3 \times 154.81$ ). Eyes missing central subfield thickness at the 5-year visit were excluded.
