# Supplementary material
Source: PubMed Central journal article supplement (PMC7483366)
Supplement: NIHMS1580242-supplement-5.pdf [file NIHMS1580242-supplement-5.pdf]

### Central Subfield Thickness Categories over Time

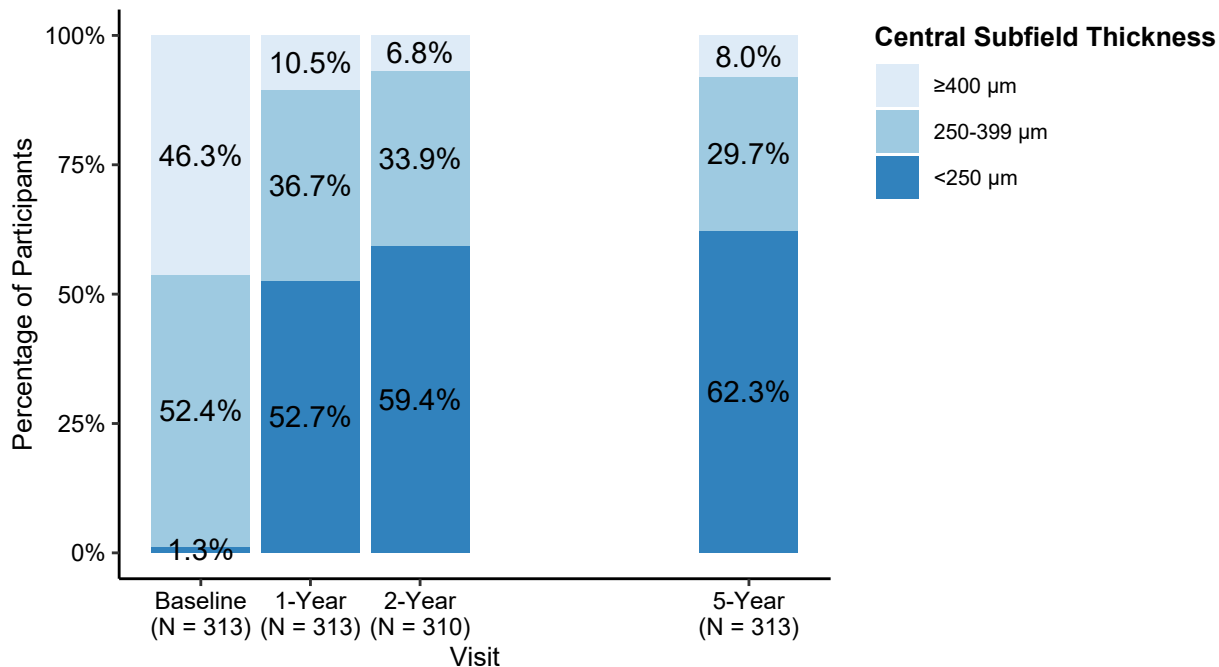

Supplemental Figure 5.

Distribution of optical coherence tomography central subfield thickness categories at annual visits among follow-up study participants from a 2-year clinical trial on anti-vascular endothelial growth factor treatment for eyes with diabetic macular edema (Protocol T).
