# Supplementary material
Source: PubMed Central journal article supplement (PMC7483366)
Supplement: NIHMS1580242-supplement-6.pdf [file NIHMS1580242-supplement-6.pdf]

### Diabetic Retinopathy Categories over Time

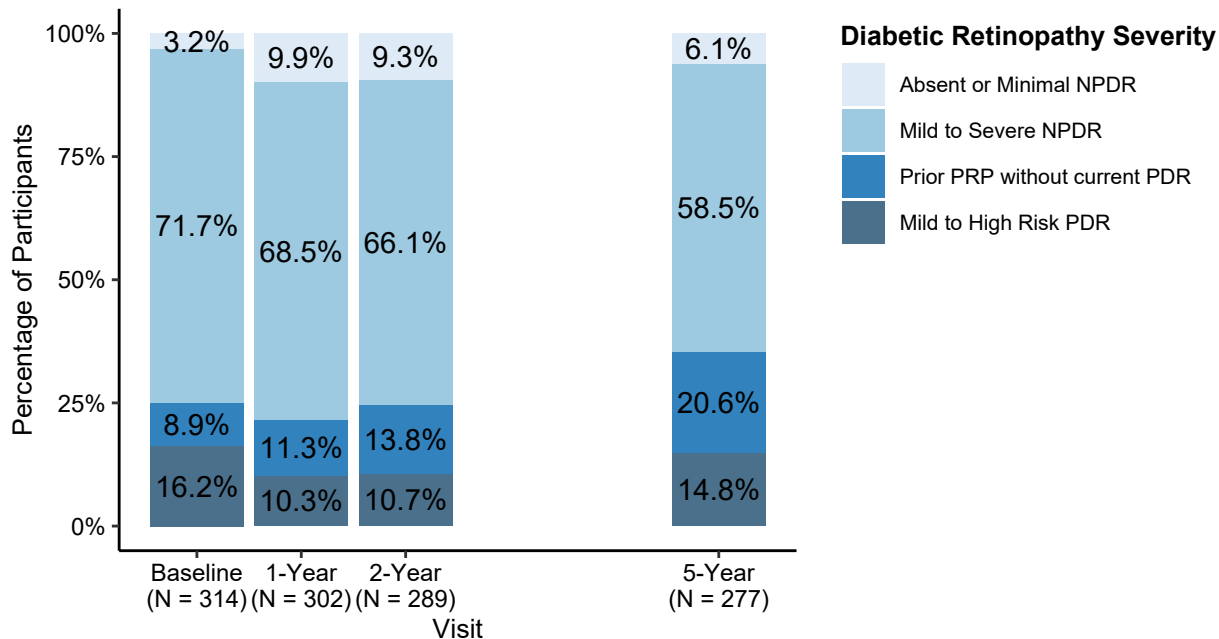

Supplemental Figure 6.

Distribution of diabetic retinopathy categories at annual visits among follow-up study participants from a 2-year clinical trial on anti-vascular endothelial growth factor treatment for eyes with diabetic macular edema (Protocol T). Abbreviations: NPDR=non-proliferative diabetic retinopathy; PDR=proliferative diabetic retinopathy.
